# Supplementary material
Source: PubMed Central journal article supplement (PMC3387036)
Supplement: 1205918109_Appendix.pdf [file 1205918109_Appendix.pdf]

# Supplementary Material

## Conservation of complex knotting and slipknotting patterns in proteins

J. I. Sulkowska, E. J. Rawdon, K. C. Millett, J.N. Onuchic and A. Stasiak

Guide to the abbreviated names of protein families listed in Table 1 (in the main text) and in tables S1 and S2.

AA-permease - amino acid permeases, ART - arginine ADP-ribosyltransferase family, BCCT - betaine/carnitine/choline transporters, DUF - domains of unknown function, EMG1 - EMG1/NEP1 methyltransferases, Herpes\_TK - herpes virus thymidine kinase, MetaL - Metalloenzymes, NCS1 - nucleobase-cation-symport-1 transporters, NPP- Nucleotide pyrophosphatases, PHY - Phytochrome region family, PmbA-TldD - Putative modulators of DNA gyrase, Pyr\_Redox\_2 - Pyridine nucleotide-disulphide oxidoreductases, RbsD/FucU Ribose/fucose transport protein family, SAM synthetase - S-adenosylmethionine synthetases, SDF - sodium:dicarboxylate symporters, SNF - Sodium: neurotransmitter symporters, SpoU\_methylase - SpoU rRNA Methylase family, SPOUT-MTase - Predicted SPOUT methyltransferase protein family, SSF - sodium:solute symporters, Trm 56 - tRNA ribose 2'-O-methyltransferases, tRNA\_m1G\_MT - tRNA (Guanine-1)-methyltransferases, virC2 - virulence C2 protein family.

Explanation of notation used in Tables S1 and S2. In several cases, the structure determination of the proteins was not complete, resulting in an uncertainty concerning the position of some fragments. For the knotting analysis, we replaced missing fragments with a straight line if the missing peptide could be placed in the vicinity of the straight line without clashing with the rest of the chain (these cases are indicated with *a*). With *b* we indicated the cases, where the missing peptide had to follow an arc to avoid a steric clash with the rest of the determined protein structure An [n] indicates proteins whose knotted pattern are established in this study.

Table S1: Simple knotting patterns ( $S_3$  and  $S_3$ ) in slipknotted proteins. The pictograms show specific knotting patterns observed for the respective protein families (Pfam classification, [1]). Respective protein names, their PDB code and host species are indicated. Dark green and light green colors indicate right- and left-handed  $3_1$  knot, respectively.

| Motif                                                                               | Family          | Protein/PDB                                                                                    | Source                                                                | Motif                                                                                | Family          | Protein/PDB                                                               | Source                                                                      |
|-------------------------------------------------------------------------------------|-----------------|------------------------------------------------------------------------------------------------|-----------------------------------------------------------------------|--------------------------------------------------------------------------------------|-----------------|---------------------------------------------------------------------------|-----------------------------------------------------------------------------|
| 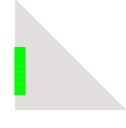   | Alk phosphatase | AP/2x98 [n]                                                                                    | Halobacteriu                                                          |    | Alk sulfatase   | PUF/3lxq                                                                  | Vibrio                                                                      |
|    | Alk phosphatase | AP/1ew2<br>AP/1shn                                                                             | Human<br>Shrimp                                                       |    | DUF             | DUF1874/2j85<br>Protein<br>114/2x4i <sup>a</sup> [n]                      | Rudivirus<br>Rudivirus                                                      |
|    | Alk phosphatase | AP/1alk                                                                                        | E.coli                                                                |    | NPP             | PhnA/1ei6[n]<br>-/2gso[n]                                                 | Pseudomonas<br>Xanthomonas                                                  |
|   | Alk phosphatase | TAP/2iuc <sup>a</sup>                                                                          | Antarctic<br>bacterium                                                |   | Herpes<br>_TK   | -/1osn <sup>a</sup> [n]<br>HSV1-T/1p7c<br>EHV4-<br>TK/1p6x                | Varicellovirus<br>Simplexvirus<br>Varicellovirus                            |
|  | Alk phosphatase | SCAP/3a52<br>[n]<br>-/3e2d [n]                                                                 | Shewanella<br>Vibrio                                                  |  | MetaL           | PMG/1ejj[n]<br>PMG/3igy[n]<br>PMG/2ify[n]                                 | Geobacillus<br>Leishmania<br>Bacillus anthracis                             |
|  | Alk sulfatase   | PALK/2vqr[n]<br>pehA/2w8s[n]<br>YidJ/2qzu[n]<br>YidJ/3b5q[n]<br>Putative<br>arylsulfatase/3ed4 | Agrobacterium<br>Burkholderia<br>Bacteroides<br>Bacteroides<br>E.coli |  | RbsD /<br>FucU  | -/2wcu[n]<br>FuCu/3mvk[n]<br>-/3e7n[n]<br>Atu2016/2ob5[n]<br>RbsD/1ogc[n] | Mouse<br>Bifidobacteriu<br>Salmonella<br>Agrobacterium<br>Bacillus subtilis |
|  | Alk sulfatase   | AS/1hdh[n]                                                                                     | Pseudomonas                                                           |  | PmbA-<br>TldD   | PmbA/3qtd <sup>a</sup> [n]<br>PmbA/1vpb[n]<br>PmbA/1vl4 <sup>a</sup> [n]  | Pseudomonas<br>Bacteroides<br>Thermotoga                                    |
|  | Alk sulfatase   | LTA/2w8d[n]<br>LTA/2w5q[n]                                                                     | Bacillus<br>Staphylococcus                                            |  | ADP-<br>ribo    | ART/1gy0[n]                                                               | Rat                                                                         |
|  | Alk sulfatase   | ASA/1auk <sup>a</sup><br>ASB/1fsu <sup>a</sup> [n]                                             | Human<br>Human                                                        |  | Pyr_<br>redox_2 | AIF/1gv4[n]                                                               | Mouse                                                                       |
|                                                                                     |                 |                                                                                                |                                                                       |  | SDF             | GltPh/1xfh                                                                | Pyrococcus<br>horikoshii                                                    |

Table S2: Simple knotting patterns ( $K3_1$  and  $K3_13_1$ ) in knotted proteins. The pictograms show specific knotting patterns observed for the respective protein families (Pfam classification, [1]). Respective protein names, their PDB code and host species are indicated. Dark green and light green colors indicate right- and left- hand  $3_1$  knot, respectively.

| Motif                                                                               | Family             | Protein/PDB                                                                                                  | Source                                                                  | Motif                                                                               | Family                 | Protein/PDB                                                                                                                  | Source                                                                                              |
|-------------------------------------------------------------------------------------|--------------------|--------------------------------------------------------------------------------------------------------------|-------------------------------------------------------------------------|-------------------------------------------------------------------------------------|------------------------|------------------------------------------------------------------------------------------------------------------------------|-----------------------------------------------------------------------------------------------------|
|    | Carbonic anhydrase | CA I/1hcb<br>CA II/1lug<br>CA II/1v9e<br>CA II/1y7w<br>CA III/1z93<br>CA III/1fj<br>CA IV/2znc<br>CA IV/1znc | Human<br>Human<br>Bovine<br>D. salina<br>Human<br>Rat<br>Human<br>Mouse |    | SpoU_methylase         | tRNAm/1zjr<br>TRNAm/1v2x<br>tRNAm/3e5y<br>putm/3ic6<br>-/3onp<br>tRNAm/3n4j[n]<br>tRNAm/3l8u[n]<br>TAR/2ha8                  | Aquifex<br>Thermus<br>Pseudomallei<br>Neisseria<br>Bordetella<br>Yersinia<br>Streptococcus<br>Human |
|   | Carbonic anhydrase | CA V/1keq                                                                                                    | Mouse                                                                   |   | SpoU_methylase         | -/3ilk <sup>a</sup>                                                                                                          | Haemophilus                                                                                         |
|  | Carbonic anhydrase | CA VI/3fe4[n]<br>CA VI/1kop                                                                                  | Human<br>N. gonorrhoeae                                                 |  | SpoU_methylase         | RNA2o/1ipa<br>-/1gz0<br>RRNAm/1x7o<br>RNAm/2i6d<br>rRNA/3gyq<br>YibK/1j85                                                    | Thermus<br>E.coli<br>Streptomyces<br>Porphyromonas<br>Streptomyces<br>Haemophilus                   |
|  | Carbonic anhydrase | CA VIII/2w2j[n]<br>CA IX/3iai[n]<br>CA XII/1jd0<br>CA XIII/3czv[n]<br>CA XIV/1rj6                            | Human<br>Human<br>Human<br>Human<br>Mouse                               |  | Methyltrans_RNA        | rmsE/1nxz<br>rmsE/1vhk <sup>a</sup><br>-/1v6z<br>PUF/3kw2 <sup>a</sup> [n]<br>PUF/2cx8<br>PUF/1z85 <sup>b</sup><br>rsmE/2egv | Haemophilus<br>Bacillus<br>Thermus<br>Porphyromonas<br>Thermus<br>Thermotoga<br>Aquifex             |
|  | Carbonic anhydrase | PTPRZ /3jxf[n]                                                                                               | Human                                                                   |  | EMG1 methyltransferase | NEP1/2v3k <sup>a</sup> [n]<br>NEP1/3o7b[n]<br>NEP1/3bbd                                                                      | Saccharomyces<br>Archaeoglobus<br>Methanocaldococcus                                                |
|  | Carbonic anhydrase | PTPRZ /3jxh[n]<br>PTPRZ /3jxg[n]                                                                             | Human<br>Mouse                                                          |  | Trm56                  | Trm56/2o3a <sup>a</sup><br>Trm56/2yy8                                                                                        | Archaeoglobus<br>Pyrococcus                                                                         |
|  | virC2              | -/2rh3                                                                                                       | Agrobacterium                                                           |  | SPOUT_MTase            | YbeA/1ns5 <sup>a</sup><br>YbeA/1o6d<br>YbeA/1vh0<br>YbeA/1to0 <sup>a</sup>                                                   | E.coli<br>Thermotoga<br>Staphylococcus<br>Bacillus                                                  |

| Motif                                                                              | Family             | Protein/PDB                  | Source                     | Motif                                                                               | Family              | Protein/PDB                                                                                                       | Source                                                                                      |
|------------------------------------------------------------------------------------|--------------------|------------------------------|----------------------------|-------------------------------------------------------------------------------------|---------------------|-------------------------------------------------------------------------------------------------------------------|---------------------------------------------------------------------------------------------|
| 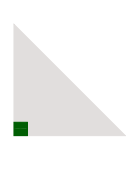  | Ribbon-helix-helix | PUF/2efv                     | Methanocaldococcus         |   | tRNA<br>_m1G<br>_MT | TrmD/3ief<br>TrmD/1uaj <sup>a</sup><br>TrmD/3ky7 <sup>a</sup><br>TrmD/1p9p <sup>a</sup><br>TrmD/3knu <sup>a</sup> | Bartonella<br>Haemophilus<br>Staphylococcus<br>E.coli<br>Phagocytophilum                    |
|   | U2 snRNP           | PHF5/2k0a                    | Saccharomyces              |   | DUF                 | 2168/3dcm[n]<br>358/2qvv <sup>a</sup> [n]<br>358/2qmm<br>358/3aia[n]<br><br>171/1k3r                              | Thermotoga<br>Vibrio cholerae<br>Archaeoglobus<br>Methanocaldococcus<br>Methanothermobacter |
|   | designed protein   | -/3mlg                       | Helicobacter               |   | SAM synthetase      | -/2obv                                                                                                            | Human                                                                                       |
|  | OTCace             | AOTCase/1yh1<br>AOTCase/1js1 | Xanthomonas<br>Bacteroides |  | SAM synthetase      | -/1fug<br>-/1qm4 <sup>a</sup><br>-/3rv2 <sup>a</sup> [n]<br>-/3iml <sup>a</sup>                                   | E.coli<br>Rat<br>Mycobacterium pseudomallei group                                           |

## References

- [1] Finn RD, et al (2006) Pfam: clans, web tools and services. *Nucleic Acids Res.* 34: D247-D251.
